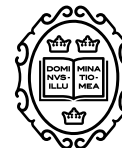

---

## Corrigendum

# Growing and cultivating the forest genomics database, TreeGenes

**Taylor Falk<sup>1,+</sup>, Nic Herndon<sup>1,+</sup>, Emily Grau<sup>1</sup>, Sean Buehler<sup>1</sup>,  
Peter Richter<sup>1</sup>, Sumaira Zaman<sup>1</sup>, Eliza M. Baker<sup>1</sup>, Risharde Ramnath<sup>1</sup>,  
Stephen Ficklin<sup>2</sup>, Margaret Staton<sup>3</sup>, Frank A. Feltus<sup>4</sup>, Sook Jung<sup>2</sup>,  
Doreen Main<sup>2</sup> and Jill L. Wegrzyn<sup>1,\*</sup>**

<sup>1</sup>Department of Ecology and Evolutionary Biology, University of Connecticut, Storrs, CT, 06269, USA, <sup>2</sup>Department of Horticulture, Washington State University, Pullman, WA, USA, <sup>3</sup>Department of Entomology and Plant Pathology, University of Tennessee, Knoxville, TN, 37996, USA and <sup>4</sup>Department of Genetics and Biochemistry, Clemson University, Clemson, SC, 29634, USA

\*Corresponding author: Email: [jill.wegrzyn@uconn.edu](mailto:jill.wegrzyn@uconn.edu)

+Co-first authors

Citation details: Falk,T., Herndon,N., Grau,E. *et al.* Growing and cultivating the forest genomics database, TreeGenes. *Database* (2018) Vol. 2018: article ID bay084; doi:10.1093/database/bay084

---

The 'Database URL' has been changed to link to <https://treegenesdb.org/Drupal>
